# Supplementary material
Source: MDPI journal article supplement (https://www.mdpi.com/1996-1073/12/18/3585)
Supplement: s1 [file BaseData.xlsx]

## Sheet: Sheet1
Year	Proportion of cattle with access to pasture/meadow	Number of days per year of grazing for cattle	Number of hours per day of grazing for cattle	Proportion of animals with access to pasture/meadow	Number of days per year of grazing for animals	Number of hours per day of grazing for animals	Total number of hours of grazing per year for cattle	Total number of hours of grazing per year for animals	Estimated quantity of N, e.g. through mineral, recycled and other fertilizers	Estimated quantity of P, e.g. through mineral, recycled and other fertilizers	Estimated quantity of K, e.g. through mineral, recycled and other fertilizers	Number of cattle	Number of horses	Number of pigs	Number of sheep	Number of goat	Number of poultry	Total number of animals	The total animal number in livestock units	Milk consumption	Meat consumption	Milk production	Meat production	Surface area of cereal in ha	Surface area of roots in ha	Surface area of other crops in ha	Total agricultural surface area in ha	Cereal production in t	Number of inhabitants in Switzerland	Growth Domestic Product per capita	Total household and municipal garbage collected per capita in kg	Household garbage thermally treated per capita in kg	Household garbage separately collected per capita in kg	Percentage of household and municipal garbage recycled	Plant material separately collected per capita in kg	Industrial production index in percent	Paper separately collected per capita in kg	Yearly production in Mio CHF for the agriculture and forestry branch	Yearly production in Mio CHF for the food and tobacco branch	Yearly production in Mio CHF for the textile branch	Yearly production in Mio CHF for the paper and cardboard industry branch	Yearly production in Mio CHF for the printing industy branch	Yearly production in Mio CHF for the pharmaceutical industry banch	Yearly production in Mio CHF for the retailers	Yearly production in Mio CHF for the restauration industry branch	Quantity of vegetal energy in TJ produced yearly	Quantity of animal energy in TJ produced yearly	Quantity of fresh vegetables in t	Quantity of vegetables to keep in t
1996																			1336189			3020916		392875	36780.3	75946.2	1.08288e+06		7062354	57217.5	599.942	352.132	247.809	41.336	63.2295	100	140.191
1997																						2999631		372747	35583.6	79036.4	1.07573e+06		7081346	58154.1	606.443	350.14	256.303	42.2155	66.5266	104.6	140.541	12196.7	28468.1	4753.81	3964.74	6268.68	28202	31265.6	12721.5
1998												1640871	43021	1379359	418576	56846	6237066	16531248			53.8	3014282		373736	34183.2	78581.4	1.0784e+06	1240975	7096465	59653.3	610.594	343.767	266.827	43.7275	70.2907	108.3	148.396	11954.9	28076.3	4807.25	4056.41	5798.31	31598.8	30835.4	12757.8
1999												1608735	45799	1394913	420350	57966	6352359	16756596			53.1			364514	34429.4	77262.3	1.0719e+06	1028481	7123537	60404.6	636.206	363.128	273.078	42.9505	71.2291	112.2	152.753	11339.2	29003.6	4465.07	4187.51	5937.01	32600.8	31921.8	13136.9
2000												1588005	46297	1486955	422270	60106	6565971	17264248	1349947		51.9	2976137		365339	34774.4	75104.4	1.07249e+06	1169500	7164444	63379	658.774	360.724	298.05	45.2526	89.2758	121.6	158.364	12022.7	28608	4356.1	4354.59	6072.23	34061	32837.8	13400.1
2001												1611351	48509	1453250	423521	66007	6731089	17602853	1229343		51.9	3110938		359153	34072.6	76572.8	1.07113e+06	1079600	7197638	64586.4	665.79	355.556	310.234	46.5963	90.2778	120.8	162.279	11112.8	29342.3	4323.36	4264.94	6141.86	36760.1	33820.7	13796.2
2002	85.3	165	8.7	0.0451338	167.719	9.02273	1343.47	68.3001				1593697	50347	1498223	420740	66972	6789720	17747478	1225304		52.8	3107479		346964	33840.4	81294.3	1.06977e+06	1087700	7255653	64058.5	676.034	360.274	315.76	46.7191	99.7808	114.6	158.851	11157.5	30804.2	4084.67	4384.94	5985.96	42056.8	33871.8	13249.4
2003												1570178	50116	1547711	419995	67693	6807885	17809267	1287028		52.1	3079814		333115	33022.2	84069.2	1.06705e+06	847100	7313853	64330.1	668.791	351.02	317.771	47.5151	100.68	115.1	153.631	11067.9	30593.5	3524.71	4275.93	5630.73	43672.7	34931.7	13000.7
2004												1544547	51236	1556717	429503	70810	7206221	18616804	1271145		51.7	3072045		323505	33608.9	85940.7	1.06457e+06	1089000	7364148	65893.5	659.278	336.958	322.32	48.7375	100.653	119.7	156.912	11670.4	31782.3	3619.41	4153.03	5407.98	47306.7	35330.3	12912.4
2005												1554696	52672	1528933	444811	72531	7444591	19112839	1289324		51.7	3093639		335376	32197.3	86426.1	1.06512e+06	1056500	7415102	68013.2	662.122	327.122	335	50.6073	103.231	122.9	166.754	10878.9	32737.8	3507.31	4143.97	5361.63	51811.6	35740.3	13281.2
2006												1566887	53701	1537505	440522	75892	7912624	20069870			51.2	3064215		332867	32113.1	87054.7	1.0652e+06	1012600	7459128	71797.9	708	352	356	50.0939	117.838	132.5	170.323	10934.5	34193.7	3682.64	4047.29	5285.91	58812.6	36258.9	13774.6
2007	96.5	181	8.5	0.641935	182.886	8.74822	1542.07	1027.05				1571764	55126	1609497	446350	79499	8116604	20576419	1293284	255.684	51.7995	3118601	323377	315145	33613	88485.7	1.06024e+06	1011900	7508739	75914.2	718	351	367	50.9577	122.507	145.1	174.444	11438.5	35191.9	3887.77	4423.41	5320.29	64125	37525.8	14505.2			243537	67233
2008									132300	49900	190000	1604287	56377	1634801	450944	82019	7516946	19451660	1314192	252.642	52.6163	3183089	319009	312209	32600.2	89525.7	1.0581e+06	1001644	7593494	78180	733	366	367	49.9422	120.773	147	175.729	11985.9	38175.7	4075.31	4558.47	5299.25	68665.8	39703.4	15434.8	11447	11571	249593	70704
2009									137900	52100	199400	1597484	57720	1573090	443584	85103	8101840	20547068	1324147	245.856	51.1506	3290982	329816	305684	32411	90148.2	1.05565e+06	1005780	7701856	75787.6	700	340	360	51.2935	119.491	135.4	169.201	11208.6	38434.5	3320.79	3873.49	4732.27	71480.5	40089.1	15114.6	12210	11639	274054	90323
2010	95.5	177	8.6	0.606622	178.134	8.87093	1523.22	958.591	138300	52300	199500	1591233	58969	1540129	446153	87602	8474239	21265288	1325666	248.891	52.4021	3303121	342139	303026	29639.9	90815.1	1.05175e+06	923585	7785806	77502	706	349	357	50.4305	118.223	143.9	164.984	10911	38526.2	3569.3	3889.24	4626.53	71720.9	40649.7	15426.8	11076	11818	260376	81093
2011									137400	51900	198200	1577407	60156	1557204	431889	85313	8741117	21771561	1316648	252.2	52.2287	3303720	345011	290543	31484.8	92739.9	1.05187e+06	999087	7870134	78516.8	689	344	345	50.144	107.036	145.3	165.416	11046.9	37660.7	3596.69	3757.17	4270.19	70222.7	39955.1	15175	13007	11905	298033	73387
2012									137900	52000	198700	1564631	62113	1588998	434083	86987	8943676	22207347	1315460	247.68	50.3502	3378911	342186	293864	30798.3	91723.6	1.05104e+06	950173	7954662	78332.5	694	347	347	49.9958	105.911		167.261	10871.5	37338.4	3419.19	3457.3	3988.56	74658.3	39729.1	14687.6	11721	11708	286671	94497
2013									138300	52100	199700	1557474	57246	1578687	424018	86215	9390871	23052861	1307319	251.584	50.5417	3264514	337806	294920	31558.3	92810.3	1.04992e+06	867020	8039060	78891.1	702	344	358	50.9839	121.773		162.193	11178.5	37738.8	3397.03	3343.29	3757.74	76429.2	39427.5	14966.5	11230	11543	279709	81554
2014									138200	52100	199100	1562801	58031	1544017	417274	88089	9878279	23990164	1307872	248.167	50.6808	3415670	346124	286833	32965	95107.4	1.05126e+06	994071	8139631	79343.8	729	339	390	53.5442	152.464		165.114	11565.4	37991.1	3458.52	3227.84	3648.85	78270.1	39708.2	14973.6	12621	11864	299896	83038
2015									139600	52600	201000	1554319	57243	1484732	409493	87935	10003437	24155267	1320406	246.696	49.8276	3364882	345765	288298	31180.1	97525.5	1.04972e+06	909337	8237666	78930.7	724	342	382	52.7487	150.816		156.966	11060.9	36560.9	3253.08	3014.52	3444.09	80032.2	39311.1	14644.2	11532	11789	293917	84958
2016									139100	52500	200300	1555396	57200	1498321	402772	87817	10644412	25438119	1315243			3310866	348057	289694	30593.5	97257.4	1.04907e+06	743413	8327126		716	340	376		153.712		151.182	11082	37188.6	3161.4	2951.8	3306.34	87432.2	38800	14907.8			287578	85460
References	Kupper, T., et al., Ammoniakemissionen in der Schweiz 1990-2010 und Prognose bis 2020. 2013, BAFU, Bundesamt für Umwelt.								Agristat Statistische Erhebungen und Schätzungen über Landwirtschaft und Ernährung; 2016			BFS Entwicklung der Nutztierbestände. http://www.bfs.admin.ch/bfs/portal/de/index/themen/07/03/blank/ind24.indicator.240205.2402.html (access date 01.08.2016)							BLW, Agrar Bericht 2017. http://2017.agrarbericht.ch/de	BFS, Entwicklung des Nahrungsmittelverbrauch in der Schweiz. Je Kopf und Jahr (je-d-07.06.02). In https://www.bfs.admin.ch/bfs/de/home/statistiken/kataloge-datenbanken/tabellen.assetdetail.5866399.html, 2016.		BLW Evaluation des données sur la production laitière, année civile 2017; https://www.blw.admin.ch/blw/fr/home/nachhaltige-produktion/tierische-produktion/milch-und-milchprodukte.html, 2018.	Proviande Der Fleischmarkt im überblick 2016 https://www.proviande.ch/fr/services-statistique/statistique/publications/archive.html, 2017.	BFS, Landwirtschaftliche Nutzfläche. Ohne Sömmerungsweiden 1985-2016. In https://www.bfs.admin.ch/bfs/de/home/statistiken/kataloge-datenbanken/tabellen.assetdetail.7106327.html, 2016.				BFS, Production de céréales, évolution (07.02.03.01.01). 2017: https://www.bfs.admin.ch/bfs/fr/home/statistiques/catalogues-banques-donnees/tableaux.assetdetail.6369498.html	BFS, Bilan de la population résidente permanente de 1861 à 2016 (su-f-01.02.04.05). In https://www.bfs.admin.ch/bfs/en/home/statistics/catalogues-databases/tables.assetdetail.5886176.html, 2018.	BFS, Bruttoinlandprodukt pro Einwohner, lange Serie, 1948-2016 (4.02.01.05). In https://www.bfs.admin.ch/bfs/de/home/statistiken/volkswirtschaft/volkswirtschaftliche-gesamtrechnung/bruttoinlandprodukt.assetdetail.6028921.html, 2017.	BFS, Siedlungsabfälle (02.03.02.10). In https://www.bfs.admin.ch/bfs/de/home/statistiken/kataloge-datenbanken/tabellen.assetdetail.4082480.html, 2017.			BFS, Siedlungsabfälle-Separatsammelquote - Anteil der separat gesammelten Abfälle im Verhältnis zur Gesamtmenge der verursachten Siedlungsabfälle - In Prozent In https://www.bfs.admin.ch/bfs/de/home/statistiken/nachhaltige-entwicklung/monitoring-ziele-agenda-2030/alle-nach-themen/12-konsum-produktion/abfall-separatsammelquote.assetdetail.5626310.html, 2018	BAFU, AB099_Separat gesammelte Abfälle_20180814_BAFUIndikatorDatenblatt1. In https://www.bafu.admin.ch/bafu/it/home/temi/rifiuti/stato/indicatori/indikator-abfall/_jcr_content/par/externalcontent.external.exturl.xlsx/aHR0cHM6Ly93d3cuaW5kaWthdG9yZW4uYWRtaW4uY2gvUHVibG/ljL0V4cG9ydD92ZXJzaW9uSWQ9MzI5MyZjb25maWc9MQ==.xlsx, 2018	BAFU, QU068_Industrielle Produktion_20180814_BAFUIndikatorDatenblatt1. In https://www.bafu.admin.ch/bafu/de/home.html, 2014.		BFS, Compte de production par branches (50 branches) (je-f-04.02.03.01). In https://www.bfs.admin.ch/bfs/de/home/statistiken/volkswirtschaft/volkswirtschaftliche-gesamtrechnung/produktionskonto.assetdetail.5966197.html, 2018.								Agristat Statistische Erhebungen und Schätzungen über Landwirtschaft und Ernährung; 2016
[truncated: 2 more columns]
